# Supplementary material
Source: Research Square preprint supplement (doi:10.21203/rs.3.rs-9372249/v1)
Supplement: Supplementary file 1 [file 7698bacf1819bb4224c48907.docx]

**Appendix**

Appendix Table S1 tests robustness to outcome measurement by replacing recorded birth weight with a binary indicator equal to one if the mother reports the child as small/very small at birth. Estimates are obtained using Poisson pseudo–maximum likelihood with DHS sampling weights and county and birth-year fixed effects. Pregnancy rainfall is associated with a statistically significant reduction in the risk of being classified as small/very small, while pregnancy temperature is not robustly related to this outcome. Adding NDVI does not materially change the rainfall or temperature estimates. These results suggest that the rainfall-related patterns observed in the main analysis are not driven solely by the subset of births with measured birth weight, and they extend to a broader (though noisier) indicator of early-life health.

|  | (1) | (2) |
| --- | --- | --- |
|  | Rain+temp | + NDVI |
| Small/very small (DHS size categories 1–2) |  |  |
| Rainfall (pregnancy total, per 100 mm) | -0.02*** | -0.03*** |
|  | (0.01) | (0.01) |
|  |  |  |
| Temperature (pregnancy mean, °C) | 0.00 | 0.01 |
|  | (0.01) | (0.01) |
|  |  |  |
| NDVI (pregnancy mean ×10) |  | 0.01 |
|  |  | (0.03) |
|  |  |  |
| Constant | -1.81*** | -1.85*** |
|  | (0.20) | (0.24) |
| Fixed effects | Yes | Yes |
| Controls | Yes | Yes |
| Observations | 21306.00 | 21306.00 |

Outcome equals 1 if DHS child size is reported as small/very small (categories 1–2). Estimates are reported as percent changes in risk: 100*(exp(beta)−1). Models use Poisson PML with sampling weights and standard errors clustered at the DHS PSU. Fixed effects include county and birth year; birth-month fixed effects are omitted for stability given sparsity and the coarse subjective nature of the outcome. NDVI is scaled ×10 (1 unit = 0.10 NDVI). * *p* < 0.1, ** *p* < 0.05, *** *p* < 0.01

Appendix Table S2 assesses sensitivity to selective observation of birth weight by re-estimating the main shock specifications using inverse probability weights derived from a model predicting whether birth weight is recorded. After reweighting, temperature anomalies remain strongly associated with lower birth weight, while rainfall anomalies remain statistically indistinguishable from zero. The similarity between the IPW-adjusted and baseline estimates suggests that selective reporting of birth weight is unlikely to be driving the paper’s central conclusions about the relative importance of thermal shocks versus rainfall anomalies.

Robustness: Table 2 shocks with IPW for BW observed

|  | (1) | (2) |
| --- | --- | --- |
|  | IPW | IPW + NDVI |
| Rainfall anomaly z-score (pregnancy) | -1.961 | 10.75 |
|  | (8.290) | (9.693) |
|  |  |  |
| Temperature anomaly z-score (pregnancy) | -41.23*** | -47.15*** |
|  | (8.249) | (8.705) |
|  |  |  |
| NDVI anomaly z-score (pregnancy; NDVI×10 then standardized) |  | -29.96** |
|  |  | (10.16) |
| Observations | 13333 | 13333 |

**Notes:** IPW uses a logit model for Pr(BW observed) with maternal age, birth order, maternal education, urban residence, child sex, singleton indicator, birth year fixed effects, and county fixed effects. Final weights equal DHS sampling weights (v005/1e6) multiplied by stabilized IPW, trimmed at the 99th percentile among BW-observed births.” *p < 0.1, ** p < 0.05, *** p < 0.01
